# Supplementary material for: Survival Is Related to Estrogen Signal Transduction Pathway Activity in Postmenopausal Women Diagnosed with High-Grade Serous Ovarian Carcinoma
Source: MDPI journal article supplement (doi:10.3390/cancers13205101), 2021-10-12
Supplement: s1 [file s1]

## Supplementary tables

**Table S1.** Clinicopathological characteristics of the subgroups based on ER pathway activity in postmenopausal HGSC patients.

| Variable                                   | Quartile 1<br><i>n</i> =17 (%) | Quartile 2<br><i>n</i> =17 (%) | Quartile 3<br><i>n</i> =17 (%) | Quartile 4<br><i>n</i> =16 (%) | P-value* |
|--------------------------------------------|--------------------------------|--------------------------------|--------------------------------|--------------------------------|----------|
| <b>Age at diagnosis</b>                    |                                |                                |                                |                                | 0.828    |
| Median (IQR)                               | 65 (63 – 72)                   | 65 (61 – 71)                   | 67 (59 – 73)                   | 64 (58 – 72)                   |          |
| <b>FIGO stage</b>                          |                                |                                |                                |                                | 1.000    |
| IIIC                                       | 15 (88)                        | 15 (88)                        | 15 (88)                        | 14 (87)                        |          |
| IV                                         | 2 (12)                         | 2 (12)                         | 2 (12)                         | 8 (13)                         |          |
| <b>CA125 concentration at diagnosis</b>    |                                |                                |                                |                                | 0.220    |
| Median (IQR)                               | 340 (68–737)                   | 690 (242–2057)                 | 245 (59–603)                   | 288 (163–1032)                 |          |
| Missing ( <i>n</i> )                       | -                              | 1 (6)                          | 1 (6)                          | -                              |          |
| <b>CA125 concentration after treatment</b> |                                |                                |                                |                                | 0.826    |
| Median (IQR)                               | 13 (9 – 16)                    | 12 (8 – 16)                    | 11 (7 – 13)                    | 12 (6 – 14)                    |          |
| Missing ( <i>n</i> )                       | 4 (24)                         | 3 (18)                         | 4 (24)                         | 2 (13)                         |          |
| <b>Debulking type</b>                      |                                |                                |                                |                                | 0.990    |
| Primary                                    | 9 (53)                         | 10 (59)                        | 9 (53)                         | 8 (50)                         |          |
| Interval                                   | 7 (41)                         | 6 (35)                         | 8 (47)                         | 7 (44)                         |          |
| Other**                                    | 1 (6)                          | 1 (6)                          |                                | 1 (6)                          |          |
| <b>Debulking outcome</b>                   |                                |                                |                                |                                | 0.910    |
| Complete                                   | 13 (76)                        | 11 (65)                        | 13 (76)                        | 11 (69)                        |          |
| Optimal                                    | 3 (18)                         | 4 (23)                         | 2 (12)                         | 2 (12)                         |          |
| Incomplete                                 | 1 (6)                          | 2 (12)                         | 2 (12)                         | 3 (19)                         |          |

\* Differences in continuous variables were tested with a Mann-Whitney U test (skewed distribution). For categorical variables, P-values were obtained from a

Fisher's exact test.

\*\* Incomplete primary debulking followed by neo-adjuvant chemotherapy and afterwards a secondary interval debulking with adjuvant chemotherapy.

Abbreviations: IQR, interquartile range.
